# Hydrogenotrophic methanogens of the mammalian gut: functionally similar, thermodynamically different. A modelling approach

1 **Rafael Muñoz-Tamayo<sup>1\*,¶</sup>, Milka Popova<sup>2,¶</sup>, Maxence Tillier<sup>2</sup>, Diego P. Morgavi<sup>2</sup>, Jean-Pierre**  
2 **Morel<sup>3</sup>, Gérard Fonty<sup>3</sup>, Nicole Morel-Desrosiers<sup>3</sup>**

3 <sup>1</sup>UMR Modélisation Systémique Appliquée aux Ruminants, INRA, AgroParisTech, Université Paris-  
4 Saclay, 75005, Paris, France

5 <sup>2</sup>Institute National de la Recherche Agronomique, UMR1213 Herbivores, Clermont Université,  
6 VetAgro Sup, UMR Herbivores, Clermont-Ferrand, France

7 <sup>3</sup>Université Clermont Auvergne, CNRS, LMGE, F-63000 Clermont-Ferrand, France

8

9 **Running title: Thermodynamic and kinetic modelling of gut methanogens**

10

11 **\* Correspondence:** Rafael Muñoz-Tamayo, UMR Modélisation Systémique Appliquée aux  
12 Ruminants, INRA, AgroParisTech, 16 Rue Claude Bernard, Paris, 75005, France. Tel: 00 33

13 144081759. E-mail : [Rafael.Munoz-Tamayo@inra.fr](mailto:Rafael.Munoz-Tamayo@inra.fr)

14

15 **¶** These authors contributed equally to this work

16

17

18

## 19 **Abstract**

20 Methanogenic archaea occupy a unique and functionally important niche in the microbial ecosystem  
21 inhabiting the gut of mammals. The purpose of this work was to quantitatively characterize the  
22 dynamics of methanogenesis by integrating microbiology, thermodynamics and mathematical  
23 modelling. For that, *in vitro* growth experiments were performed with key methanogens from the  
24 human and ruminant gut. Additional thermodynamic experiments to quantify the methanogenesis heat  
25 flux were performed in an isothermal microcalorimeter. A dynamic model with an energetic-based  
26 kinetic function was constructed to describe experimental data. The developed model captures  
27 efficiently the dynamics of methanogenesis with concordance correlation coefficients between  
28 observations and model predictions of 0.93 for CO<sub>2</sub>, 0.99 for H<sub>2</sub> and 0.97 for CH<sub>4</sub>. Together, data and  
29 model enabled us to quantify species-specific metabolism kinetics and energetic patterns within the  
30 group of cytochrome-lacking methanogenic archaea. Using a theoretical exercise, we showed that  
31 kinetic information only cannot explain ecological aspects such as microbial coexistence occurring in  
32 gut ecosystems. Our results provide new information on the thermodynamics and kinetics of  
33 methanogens. This understanding could be useful to (i) construct novel gut models with enhanced  
34 prediction capabilities and (ii) devise feed strategies for promoting gut health in mammals and  
35 mitigating methane emissions from ruminants.

## 36 **Introduction**

37 Methanogenic archaea inhabit the gastro-intestinal tract of mammals where they have established  
38 syntrophic interactions within the microbial community (1–3) and thus play a critical role in the energy  
39 balance. In the human gut microbiota, implication of methanogens in organism homeostasis or diseases  
40 is poorly studied, but of growing interest. *Methanobrevibacter smithii* (accounting for 94% of the

41 methanogen population) and *Methanospaera stadmanae* are specifically recognized by the human  
42 innate immune system and contribute to the activation of the adaptive immune response (4). Decreased  
43 abundance of *M. smithii* was reported in inflammatory bowel diseases patients (5), and it has been  
44 shown that methanogens may contribute to obesity (6). In the rumen, the methanogens community is  
45 more diverse though still predominated by *Methanobrevibacter* spp., followed by *Methanomicrobium*  
46 spp., *Methanobacterium* spp. (7) and *Methanomassillicoccus* spp (8). However, the proportion of these  
47 taxa could vary largely, with *Methanomicrobium mobile* and *Methanobacterium formicium* being  
48 reported as major methanogens in grazing cattle (9). Though methanogens in the rumen are essential  
49 for the optimal functioning of the ecosystem (by providing final electron acceptors), the methane they  
50 produce is emitted by the host animal and contributes to global greenhouse gas emissions. Livestock  
51 sector is responsible for 14.5 of the anthropogenic greenhouse gas emissions (10). Some  
52 *Methanobrevibacter*-related taxa, as *M. smithii*, *M. gottschalkii*, *M. milerae* and *M. thaueri* correlated  
53 with higher methane production, whereas *M. ruminantium* was 1.3 fold more abundant in low emitters  
54 (11). Methanogens, in general, are phylogenetically and metabolically diverse, but could be separated  
55 in two groups based on the presence or absence of cytochromes (12). Most methylotrophic and few  
56 hydrogenotrophic methanogens possess membrane-associated cytochrome receiving reducing  
57 equivalents from a methanogen specific electronic shuttle, which creates a membrane potential for ATP  
58 generation. Major rumen methanogens (13) and the dominant human archaeon, *M. smithii* (14), are  
59 hydrogenotrophic without cytochrome. Cytochrome-lacking methanogens exhibit lower growth yields  
60 than archaea with cytochromes (*e.g.* aceticlastic methanogens) (12). However, this apparent energetic  
61 disadvantage has been counterbalanced by a great adaptation to the environmental conditions (15), and  
62 by the establishment of syntrophic interactions with other microbes within the orchestration of the  
63 degradation and further fermentation of feed. This syntrophic cooperation centred on the transfer and  
64 utilization of hydrogen makes possible anaerobic reactions of substrate conversion to take place close  
65 to thermodynamic equilibrium (16,17) (that is with Gibbs free energy change close to zero).

66 To our knowledge, the impact of thermodynamics on human gut metabolism has been poorly addressed  
67 in existing mathematical models (18–21). For the rumen, due to the important role of thermodynamic  
68 control on the fermentation, research teams have been motivated in addressing the question of  
69 incorporating thermodynamic principles into mathematical models (22–27). Despite these relevant  
70 efforts, much work remains to be conducted for attaining a predictive thermodynamic-based model  
71 that allows for quantitative assessment of the impact of the thermodynamics on fermentation dynamics.  
72 Theoretical frameworks have been developed to allow stoichiometric and energetic balances of  
73 microbial growth from the specification of the anabolic and catabolic reactions of microbial  
74 metabolism (28,29), and advances have been done to link thermodynamics to kinetics (30–32). These  
75 works constitute a solid basis for tackling the thermodynamic modelling of gut metabolism. In this  
76 respect, new knowledge on the extent of methanogenesis could help to improve existing gut models.  
77 Accordingly, our purpose was to quantitatively characterize the dynamics of hydrogen utilization,  
78 methane production, growth and heat flux of three hydrogenotrophic methanogens by integrating  
79 microbiology, thermodynamics, and mathematical modelling. We investigated the rate and extent of  
80 methanogenesis by performing *in vitro* experiments with three methanogenic species representing  
81 major human and ruminant genera: *M. smithii*, *M. ruminantium* and *Methanobacterium formicium*. To  
82 interpret and get the most out of the resulting data, a mathematical model with thermodynamic basis  
83 was developed to describe the dynamics of the methanogenesis.

## 84 **Material and Methods**

### 85 ***In vitro* growth experiments**

#### 86 **Archaeal strains and growth media**

87 Archaeal strains used in the study were *Methanobrevibacter ruminantium* DSM 1093, *M. smithii*, and  
88 *Methanobacterium formicium*. The growth media was prepared as previously described (33) and

89 composition is summarized in Table S1 of the Supplementary material. Rumen fluid, that was the main  
90 constituent of the culture medium, was sampled through the rumen cannula from a grazing dairy cow  
91 prior to the beginning of the experiment. Sampled rumen contents were firstly strained through a  
92 monofilament cloth and then centrifuged at 5 000 g for 15 min. Supernatant was autoclaved and then  
93 centrifuged again in the same conditions. Clarified rumen fluid was stored at -20°C and centrifuged  
94 again after thawing prior to media preparation. Media was boiled to expel dissolved oxygen, a reducing  
95 agent (L-cystein) and a redox indicator (resazurin) were added to keep a low redox potential and  
96 indicate the oxidative state of the medium respectively. Growth media was distributed in Balch tubes  
97 (6 ml per tube), tubes were sealed and sterilized by autoclaving at 121°C for 20 min. Media preparation  
98 and distribution was realized under CO<sub>2</sub> flushing to assure anoxic conditions. Oxygen traces from  
99 commercial gases were scrubbed using a heated cylinder containing reduced copper (33).

## 100 **Experimental design and measures**

101 Starter cultures were grown until reaching optical density at 660 nm (OD<sub>660</sub>) of  $0.400 \pm 0.030$ . Optical  
102 density was measured on a Jenway spectrophotometer. Then, exactly 0.6 ml were used to inoculate one  
103 experimental tube. Commercially prepared high purity H<sub>2</sub>/CO<sub>2</sub> (80%/20%) gas mix was added to  
104 inoculated tubes by flushing for 1 min at 2.5 Pa. Mean initial OD<sub>660</sub> and pressure values are summarized  
105 in Table S2 of the Supplementary material. Growth kinetics for each strain were followed over 72 h.  
106 The experiment was repeated twice. Each kinetics study started with 40 tubes inoculated in the same  
107 time. At a given time point, two tubes with similar OD<sub>660</sub> values were sampled. One of the tubes was  
108 used for measuring gas parameters: pressure was measured using a manometer and composition of the  
109 gas phase was analysed by gas chromatography on a Micro GC 3000A (Agilent Technologies, France).

## 110 **Microcalorimetry**

111 Microcalorimetric experiments as described by Bricheux et al. (34) were performed to determine the  
112 heat flux pattern of each methanogen. Metabolic activity and microbial growth were monitored by  
113 using isothermal calorimeters of the heat-conduction type. A TAM III (TA Instruments, France)  
114 equipped with two multicalorimeters, each holding six independent microcalorimeters, allowed  
115 continuous and simultaneous recording as a function of time of the heat flux produced by 12 samples.  
116 The bath temperature was set at 39°C; its long-term stability was better than  $\pm 1 \times 10^{-4}$  °C over 24h.  
117 Each microcalorimeter was electrically calibrated. The specific disposable 4 mL microcalorimetric  
118 glass ampoules capped with butyl rubber stoppers and sealed with aluminum crimps were filled with  
119 1.75 mL of Balch growth media and overpressed with 2.5 Pa of H<sub>2</sub>/CO<sub>2</sub> 80%/20% gas mixture for 30  
120 s. They were sterilized by autoclave and stored at 39°C until the beginning of the microcalorimetric  
121 measurements. Actively growing cultures of methanogens (OD<sub>660</sub> of 0.280±0.030 for *M. smithii*,  
122 0.271±0.078 for *M. ruminantium* and 0.142±0.042 for *M. formicium*) were stored at -20°C prior to their  
123 injection into the microcalorimetric ampoules. Inoculation was carried out by injecting 0.25 mL of the  
124 culture through the septum just before insertion of the overpressed ampoule containing Balch media  
125 into the minicalorimeter. After insertion of the ampoule the sample took about two hours to reach the  
126 bath temperature and yield a heat flux equilibrated at zero. Blank experiments were also carried out by  
127 inserting ampoules that were not inoculated and, as expected, no heat flux was observed confirming  
128 the medium sterility. Each experiment was repeated five times.

129 The heat flux  $\left(\frac{dQ}{dt}\right)$ , also called thermal power output  $P$ , was measured for each methanogen and the  
130 blank samples with a precision  $\geq 200$  nW. The heat flux data of each sample were collected every 5  
131 minutes during more than 10 days. The total heat  $Q$  was obtained by integrating the overall heat flux–  
132 time curve using the TAM Assistant Software and its integrating function (TA Instruments, France).

133 Classically, the heat flux-time curve for a growing culture starts like the S-shaped biomass curve (a lag  
134 phase followed by an exponential growth phase) but differs beyond the growth phase, the heat flux  
135 being then modulated by transition periods (34). Heat flux data can be used to infer the microbial  
136 growth rate constant. Such inference must be done with caution, since under certain conditions detailed  
137 by Braissant et al. (35) lack of correlation occurs between heat flux and microbial growth. The authors  
138 suggest that the correlation between isothermal microcalorimetry data and microbiological data (*e.g.*,  
139 cell counts) exist at early growth. During the exponential growth phase, microbial growth follows a  
140 first-order kinetics defined by the specific growth rate constant  $\mu_c$  ( $\text{h}^{-1}$ ). Analogously, the heat flux  
141 follows an exponential behaviour determined by the parameter  $\mu_c$  as described by (34,35).

142 
$$\frac{dQ}{dt} = \mu_c \cdot Q \quad (1)$$

143 The growth rate constant  $\mu_c$  can be determined by fitting the exponential part of the heat flux-time  
144 curve using the fitting function of the TAM Assistant Software. In our case study, careful selection of  
145 the exponential phase of heat flux dynamics was performed to provide a reliable estimation of the  
146 maximum growth rate constant from calorimetric data.

147

## 148 **Mathematical model development**

### 149 **Modelling *in vitro* methanogenesis**

150 The process of *in vitro* methanogenesis is depicted in Figure 1. The  $\text{H}_2/\text{CO}_2$  mixture in the gas phase  
151 diffuses to the liquid phase. The  $\text{H}_2$  and  $\text{CO}_2$  in the liquid phase are further utilized by the mono-culture  
152 of rumen methanogens producing  $\text{CH}_4$ . Methane in the liquid phase diffuses to the gas phase.

153 Model construction was inspired on our previous dynamic model of rumen *in vitro* fermentation (36)  
154 followed by certain simplifications. Due to the low solubility of hydrogen and methane (37), liquid-  
155 gas transfer was only accounted for carbon dioxide. To allow thermodynamic analysis, instead of using  
156 the Monod equation in the original formulation, we used in the present work the kinetic rate function  
157 proposed by Desmond-Le Quémener and Bouchez (38). The resulting model is described by the  
158 following ordinary differential equations

$$159 \quad \frac{dx_{H_2}}{dt} = \mu_{\max} \cdot \exp\left(-\frac{K_S \cdot V_g}{n_{g,H_2}}\right) \cdot x_{H_2} - k_d \cdot x_{H_2} \quad (2)$$

$$160 \quad \frac{ds_{CO_2}}{dt} = -\frac{Y_{CO_2} \cdot \mu_{\max}}{Y} \cdot \exp\left(-\frac{K_S \cdot V_g}{n_{g,H_2}}\right) \cdot x_{H_2} - k_L a \cdot (s_{CO_2} - K_{H,CO_2} \cdot R \cdot T \cdot n_{g,CO_2}/V_g) \quad (3)$$

$$161 \quad \frac{dn_{g,H_2}}{dt} = -\frac{\mu_{\max}}{Y} \cdot \exp\left(-\frac{K_S \cdot V_g}{n_{g,H_2}}\right) \cdot V_L \cdot x_{H_2} \quad (4)$$

$$162 \quad \frac{dn_{g,CO_2}}{dt} = V_L \cdot k_L a \cdot (s_{CO_2} - K_{H,CO_2} \cdot R \cdot T \cdot n_{g,CO_2}/V_g) \quad (5)$$

$$163 \quad \frac{dn_{g,CH_4}}{dt} = \frac{Y_{CH_4} \cdot \mu_{\max}}{Y} \cdot \exp\left(-\frac{K_S \cdot V_g}{n_{g,H_2}}\right) \cdot V_L \cdot x_{H_2} \quad (6)$$

164 Where  $s_{CO_2}$  is the concentration (mol/L) of carbon dioxide in the liquid phase and  $x_{H_2}$  is the biomass  
165 concentration (mol/L) of hydrogenotrophic methanogens. The number of moles in the gas phase are  
166 represented by the variables  $n_{g,H_2}, n_{g,CO_2}, n_{g,CH_4}$ . The gas phase volume  $V_g = 20$  mL and the liquid  
167 phase volume  $V_L = 6$  mL. Liquid-gas transfer for carbon dioxide is described by a non-equilibria  
168 transfer rate which is driven by the gradient of the concentration of the gases in the liquid and gas  
169 phase. The transfer rate is determined by the mass transfer coefficient  $k_L a$  ( $h^{-1}$ ) and the Henry's law  
170 coefficients  $K_{H,CO_2}$  (M/bar).  $R$  ( $bar \cdot (M \cdot K)^{-1}$ ) is the ideal gas law constant and  $T$  is the temperature (K).  
171 Microbial decay is represented by a first-order kinetic rate with  $k_d$  ( $h^{-1}$ ) the death cell rate constant.



172 Microbial growth was represented by the rate function proposed by Desmond-Le Quéméner and  
173 Bouchez (38) using hydrogen as the limiting reactant

174 
$$\mu = \mu_{\max} \cdot \exp\left(-\frac{K_s \cdot V_g}{n_{g,H_2}}\right) \quad (7)$$

175 where  $\mu$  is the growth rate ( $h^{-1}$ ),  $\mu_{\max}$  ( $h^{-1}$ ) is the maximum specific growth rate constant and  $K_s$  (mol/L)  
176 the affinity constant. Equation (7) is derived from energetic principles following Boltzmann statistics  
177 and uses the concept of exergy (maximum work available for a microorganism during a chemical  
178 transformation). The affinity constant has an energetic interpretation, since it is defined as

179 
$$K_s = \frac{E_M + E_{dis}}{v_{harv} \cdot E_{cat}} \quad (8)$$

180 where  $E_{dis}$  (kJ/mol) and  $E_M$  (kJ/mol) are, respectively, the dissipated exergy and stored exergy during  
181 growth,  $E_{cat}$  (kJ/mol) is the catabolic exergy of one molecule of energy-limiting substrate, and  $v_{harv}$  is  
182 the volume at which the microbe can harvest the chemical energy in the form of substrate molecules  
183 (38).  $E_{cat}$  is the absolute value of the Gibbs energy of catabolism ( $\Delta G_{r,c}$ ) when the reaction is exergonic  
184 ( $\Delta G_{r,c} < 0$ ) or zero otherwise. The stored exergy  $E_M$  is calculated from a reaction (destock) representing  
185 the situation where the microbe gets the energy by consuming its own biomass.  $E_M$  is the absolute  
186 value of the Gibbs energy of biomass consuming reaction ( $\Delta G_{r,destock}$ ) when the reaction is exergonic  
187 ( $\Delta G_{r,destock} < 0$ ) or zero otherwise. Finally, the dissipated exergy  $E_{dis}$  is the opposite of the Gibbs energy  
188 of the overall metabolic reaction, which is a linear combination of the catabolic and destock reactions.  
189 This calculation follows the Gibbs energy dissipation detailed in Kleerebezem and Van Loosdrecht  
190 (39).

191 In our model, the stoichiometry of methanogenesis is represented macroscopically by one catabolic  
192 reaction ( $R_1$ ) for methane production and one anabolic reaction ( $R_2$ ) for microbial formation. It was

193 assumed that ammonia is the only nitrogen source for microbial formation. The molecular formula of  
194 microbial biomass was assumed to be  $C_5H_7O_2N$  (37).

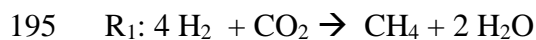

196

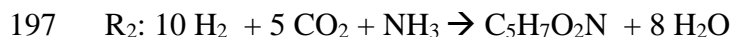

198

199 In the model, the stoichiometry of the reactions is taken into account *via* the parameters  $Y, Y_{CO_2}, Y_{CH_4}$ ,  
200 which are the yield factors (mol/mol) of microbial biomass,  $CO_2$  and  $CH_4$ . The fraction of  $H_2$  utilized  
201 for microbial growth (reaction  $R_2$ ) is defined by the yield factor  $Y$ . Now, let  $f$  be the fraction of  $H_2$   
202 used for the catabolic reaction  $R_1$ . It follows that

203 
$$f = 1 - 10 \cdot Y \quad (9)$$

204 The yield factors of  $CO_2$  and  $CH_4$  can be expressed as functions of the microbial yield factors:

205 
$$Y_{CO_2} = \left(\frac{1}{4}\right) \cdot f + \left(\frac{5}{10}\right) \cdot (1 - f) \quad (10)$$

206 
$$Y_{CH_4} = \left(\frac{1}{4}\right) \cdot f \quad (11)$$

207 The model has two physicochemical parameters ( $k_{La}, K_{H,CO_2}$ ) and four biological parameters  
208 ( $\mu_{max}, K_s, Y, k_d$ ). The initial condition for  $s_{CO_2}$  is unknown and was also included in the parameter  
209 vector for estimation. The Henry's law coefficients are known values calculated at 39°C using the  
210 equations provided by Batstone et al. (37).

## 211 **Theoretical model to study interactions among methanogens**

212 To investigate the ecology of methanogens in the gut ecosystem, we considered a toy model based on  
213 the previous model for *in vitro* methanogenesis. Let us consider the following simple model for

214 representing the consumption of hydrogen by the methanogenic species  $i$  under an *in vivo* scenario of  
215 continuous flow

$$216 \quad \frac{dx_{\text{H}_2}}{dt} = \mu_{\max,i} \cdot \exp\left(-\frac{K_{s,i} \cdot V_{\text{g}}}{n_{\text{g,H}_2}}\right) \cdot x_{\text{H}_2} - D_i \cdot x_{\text{H}_2} \quad (12)$$

$$217 \quad \frac{dn_{\text{g,H}_2}}{dt} = q_{\text{H}_2} - \frac{\mu_{\max,i}}{Y_i} \cdot \exp\left(-\frac{K_{s,i} \cdot V_{\text{g}}}{n_{\text{g,H}_2}}\right) \cdot V_{\text{L}} \cdot x_{\text{H}_2} - b \cdot n_{\text{g,H}_2} \quad (13)$$

218 where  $q_{\text{H}_2}$  (mol/h) is the flux of hydrogen produced from the fermentation of carbohydrates. The kinetic  
219 parameters are specific to the species  $i$  ( $x_{\text{H}_2,i}$ ). The parameter  $D_i$  ( $\text{h}^{-1}$ ) is the dilution rate of the  
220 methanogens and  $b$  ( $\text{h}^{-1}$ ) is an output rate constant. Extending the model to  $n$  species with a common  
221 yield factor  $Y$ , the dynamics of hydrogen is given by

$$222 \quad \frac{dn_{\text{g,H}_2}}{dt} = q_{\text{H}_2} - \frac{V_{\text{L}}}{Y} \sum_{i=1}^n \mu_{\max,i} \cdot \exp\left(-\frac{K_{s,i} \cdot V_{\text{g}}}{n_{\text{g,H}_2}}\right) \cdot x_{\text{H}_2,i} - b \cdot n_{\text{g,H}_2} \quad (14)$$

223 where the sub index  $i$  indicates the species. In our case study,  $n = 3$ .

## 224 **Parameter identification**

225 Before tackling the numerical estimation of the model parameters, we addressed the question of  
226 whether it was theoretically possible to determine uniquely the model parameters given the available  
227 measurements from the experimental setup. This question is referred to as structural identifiability (40).  
228 Structural identifiability analysis is of particular relevance for model whose parameters are biologically  
229 meaningful, since knowing the actual value of the parameter is useful for providing biological insight  
230 on the system under study (41). Moreover, in our case, we are interested in finding accurate estimates  
231 that can be further used as priors in an extended model describing the *in vivo* system.

232 We used the freely available software DAISY (42) to assess the structural identifiability of our model.  
233 Physical parameters ( $k_{L,a}, K_{H,CO_2}$ ) were set to be known. The model was found to be structurally  
234 globally identifiable. In practice, however, to facilitate the actual identification of parameters and  
235 reduce practical identifiability problems such as high correlation between the parameters (43), some  
236 model parameters were fixed to values reported in the literature. The transport coefficient  $k_{L,a}$ , the  
237 Henry's law coefficient  $K_{H,CO_2}$ , and the dead cell rate constant  $k_d$  were set to be known and were  
238 extracted from Batstone et al. (37). Analysis of the data led us to consider the microbial yield factor  $Y$   
239 to be the same for all the methanogens. The yield factor was set to be known and its value was taken  
240 from Thauer et al. (12) for cytochrome lacking methanogens. Therefore, only the parameters  
241  $\mu_{max}, K_S$  were set to be estimated. To capitalize on the calorimetric data, we further assumed that the  
242 specific rate constant ( $\mu_c$ ) estimated from the heat flux-time curve is close to the maximal growth rate  
243 constant  $\mu_{max}$  of the kinetic function developed by Desmond-Le Quéméner and Bouchez (38). By this,  
244 only the affinity constant for each strain was left to be estimated.

245 The parameter identification of the affinity constant for each methanogen was performed with the  
246 IDEAS Matlab<sup>®</sup> toolbox (44), which is freely available at <http://genome.jouy.inra.fr/logiciels/IDEAS>.  
247 IDEAS uses the maximum likelihood estimator that minimizes the following cost function.

$$248 \quad J(\mathbf{p}) = \sum_{k=1}^{n_y} \frac{n_{t,k}}{2} \ln \left[ \sum_{i=1}^{n_{t,k}} [y_k(t_{i_k}) - y_{m_k}(t_{i_k}, \mathbf{p})]^2 \right] \quad (15)$$

249 where  $n_y$  is the number of measured variables and  $n_{t,k}$  the number of observation times for the  $k$ th  
250 variable  $y_k$ , and  $y_{m_k}$  is the  $k$ th variable predicted by the model. The model output is function of the  
251 parameter vector  $\mathbf{p}$ . The measured variables are the number of moles in the gas phase ( $H_2, CH_4, CO_2$ ).  
252 The Lin's concordance correlation coefficient (CCC) (Lin, 1989) was computed to quantify the  
253 agreement between the observations and model predictions.

## 254 **Results**

### 255 **Calorimetric pattern of methanogens**

256 Figure 2 displays a representative isothermal calorimetric curve for each methanogen. The five  
257 measured heat flux dynamics of each methanogen were found to follow similar energetic patterns. *M.*  
258 *smithii* and *M. formicium* exhibited a lag phase of a few hours, while *M. ruminantium* was already  
259 metabolically active when introduced into the minicalorimeter though several attempts were made to  
260 obtain a lag phase by changing storage conditions and thawing the culture just before inoculating the  
261 microcalorimetry vials. The pattern of heat flux for all tested methanogens is characterized by one  
262 predominant peak which was observed at different times for each methanogen. *M. smithii* exhibited a  
263 second metabolic event occurring at 60 h with an increase of heat flux. The same phenomenon is  
264 observed for *M. formicium* but at lower intensity at 140 h. One possible explanation for this event is  
265 cell lysis (35). At the end of the process, heat flux ceased as result of the end of the metabolic activity.  
266 Figure 2 shows a small peak for *M. formicium* at 14 h (a similar peak, but of much smaller size, was  
267 observed on the four other curves obtained with this methanogen). *M. smithii* also exhibits a small peak  
268 at 7 h that is difficult to visualize at the scale of Figure 2 (the occurrence of this tiny peak was 5 out 5).  
269 For *M. ruminantium*, we do not know whether the tiny peak exists since the initial part of the curve is  
270 missing. This small peak translates in a metabolic activity that remains to be elucidated.

271 The total heat ( $Q_m$ ) produced during the methanogenesis process that took place under the present  
272 experimental conditions was, on average, -5.5 J for the three methanogens (for *M. ruminantium*, the  
273 missing initial part of the heat flux-time curve was approximately estimated by extrapolating the  
274 exponential fit). As we shall see below, this experimental value is consistent with the theoretically  
275 expected value.

## 276 Estimation of thermodynamic properties

### 277 Enthalpies

278 We defined two macroscopic reactions to represent the catabolism (R1) and anabolism (R2) of the  
279 methanogenesis (see Material and Methods). The heat produced during methanogenesis results from  
280 the contribution of both catabolic and anabolic reactions. So, first, we calculated the standard enthalpies  
281 of the catabolic and anabolic reactions using the standard enthalpies of formation given in Table 1 for  
282 the different compounds involved in methanogenesis. The standard enthalpy of the catabolic reaction  
283  $\Delta H_{r,c}^{\circ}$  was calculated as follows

$$284 \quad \Delta H_{r,c}^{\circ} = \Delta H_{f,CH_4}^{\circ} + 2 \cdot \Delta H_{f,H_2O}^{\circ} - (4 \cdot \Delta H_{f,H_2}^{\circ} + \Delta H_{f,CO_2}^{\circ}) = -252.96 \frac{\text{kJ}}{\text{mol}} \quad (16)$$

285 A similar equation was used for the calculation of the standard enthalpy of the anabolic reaction

$$286 \quad \Delta H_{r,a}^{\circ}$$

$$287 \quad \Delta H_{r,a}^{\circ} = \Delta H_{f,C_5H_7O_2N}^{\circ} + 8 \cdot \Delta H_{f,H_2O}^{\circ} - (10 \cdot \Delta H_{f,H_2}^{\circ} + 5 \cdot \Delta H_{f,CO_2}^{\circ} + \Delta H_{f,NH_3}^{\circ}) = -750.31 \frac{\text{kJ}}{\text{mol}} \quad (17)$$

288 These results are at 25°C since this is the temperature of the standard enthalpies of formation reported  
289 in Table 1. A correction could be made to get results at 39°C but the heat capacities reported by  
290 Wagman et al. (45) show that the temperature correction can be neglected. Next, we considered the  
291 fact that the heat of a given reaction can be calculated at any state along the reaction pathway via the  
292 determination of the reaction coordinate or degree of advancement  $\varepsilon$  (46). At constant temperature and  
293 pressure, the heat produced or consumed by a particular reaction during a given interval can indeed be  
294 calculated as follows

$$295 \quad Q = \int_{\varepsilon_0}^{\varepsilon_{t_f}} \Delta H_r^{\circ} d\varepsilon \quad (18)$$

296 For our two reactions, at the instant  $t$  we have

297 
$$\varepsilon_c(t) = \frac{n_{\text{H}_2}(t) - f \cdot n_{\text{H}_2,0}}{-4} \quad (19)$$

298 
$$\varepsilon_a(t) = \frac{n_{\text{H}_2}(t) - (1-f) \cdot n_{\text{H}_2,0}}{-10} \quad (20)$$

299 where  $n_{\text{H}_2}(t)$  is the number of moles of hydrogen at the instant  $t$ ,  $n_{\text{H}_2,0}$  is the initial number of moles  
300 of hydrogen, and  $f$  is the fraction of  $\text{H}_2$  used for the catabolic reaction. Our calorimetric experiments  
301 started with  $n_{\text{H}_2,0} = 8.83 \cdot 10^{-5}$  mol in all cases. At the final time  $t_f$ , all the hydrogen was consumed,  
302 so that  $n_{\text{H}_2}(t_f) = 0$ . As indicated in section Parameter Identification, we use the microbial yield factor  
303  $Y$  given by Thauer et al. (12) for cytochrome lacking methanogens, that is  $Y=0.006$  which implies that  
304  $f=0.94$ . Accordingly,  $\varepsilon_c = 2.075 \cdot 10^{-5}$  mol and  $\varepsilon_a = 5.30 \cdot 10^{-7}$  mol. It thus follows that the  
305 overall heat produced during the methanogenesis process ( $Q_m$ ) can be calculated using the following  
306 equation

307 
$$Q_m = Q_c + Q_a = \varepsilon_c(t_f) \cdot \Delta H_{r,c}^\circ + \varepsilon_a(t_f) \cdot \Delta H_{r,a}^\circ \quad (21)$$

308 where  $Q_c, Q_a$  are the heat produced during catabolism and anabolism respectively. Equation (21) can  
309 also be written as

310 
$$Q_m = n_{\text{H}_2,0} \left[ \frac{(1-10Y)}{4} \cdot \Delta H_{r,c}^\circ + Y \cdot \Delta H_{r,a}^\circ \right] \quad (22)$$

311 Under the experimental conditions, this yields

312 
$$Q_m = Q_c + Q_a = (-5.25) + (-0.40) = -5.65 \text{ J} \quad (23)$$

313 This shows that the anabolic reaction contributes to only 7% of the metabolic heat. It is also interesting  
314 to note that there is a very good agreement between the theoretical value calculated above and the  
315 overall heat experimentally determined by microcalorimetry (-5.5 J).

316 Since the substrate was totally consumed, the enthalpy of the methanogenesis process per mole (or C-  
317 mol) of biomass formed,  $\Delta H_m$ , can be calculated as follows

$$318 \quad \Delta H_m = \frac{Q_m}{n_{\text{biomass}}} = \frac{Q_m}{Y \cdot n_{\text{H}_2,0}} = \frac{(1-10Y)}{4 \cdot Y} \cdot \Delta H_{r,c}^\circ + \Delta H_{r,a}^\circ \quad (24)$$

319 which yields

$$320 \quad \Delta H_m = -10658 \frac{\text{kJ}}{\text{mol}} = -2132 \frac{\text{kJ}}{\text{C-mol}} \quad (25)$$

### 321 **Gibbs energies and entropies**

322 Following a procedure analogous to the one used above for the enthalpies, the standard Gibbs energies  
323 of the catabolic ( $\Delta G_{r,c}^\circ$ ) and anabolic ( $\Delta G_{r,a}^\circ$ ) reactions were calculated using the standard Gibbs energies  
324 of formation listed in Table 1.

$$325 \quad \Delta G_{r,c}^\circ = \Delta G_{f,\text{CH}_4}^\circ + 2 \cdot \Delta G_{f,\text{H}_2\text{O}}^\circ - (4 \cdot \Delta G_{f,\text{H}_2}^\circ + \Delta G_{f,\text{CO}_2}^\circ) = -130.62 \frac{\text{kJ}}{\text{mol}} \quad (26)$$

$$326 \quad \Delta G_{r,a}^\circ = \Delta G_{f,\text{C}_5\text{H}_2\text{O}_7\text{N}}^\circ + 8 \cdot \Delta G_{f,\text{H}_2\text{O}}^\circ - (10 \cdot \Delta G_{f,\text{H}_2}^\circ + 5 \cdot \Delta G_{f,\text{CO}_2}^\circ + \Delta G_{f,\text{NH}_3}^\circ) = -248.24 \frac{\text{kJ}}{\text{mol}} \quad (27)$$

327 The free energy of the methanogenesis process per mole (or C-mol) of biomass formed,  $\Delta G_m$ , can then  
328 obtained from the following equation

$$329 \quad \Delta G_m = \frac{(1-10Y)}{4 \cdot Y} \cdot \Delta G_{r,c}^\circ + \Delta G_{r,a}^\circ \quad (28)$$

330



331 which yields

$$332 \quad \Delta G_m = -5364 \frac{\text{kJ}}{\text{mol}} = -1073 \frac{\text{kJ}}{\text{C-mol}} \quad (29)$$

333 Knowing that, at constant temperature and pressure,

$$334 \quad \Delta G_m = \Delta H_m - T \cdot \Delta S_m \quad (30)$$

335 it follows that the entropic contribution to the methanogenesis process is equal to

$$336 \quad T \cdot \Delta S_m = \Delta H_m - \Delta G_m = -5294 \frac{\text{kJ}}{\text{mol}} = -1059 \frac{\text{kJ}}{\text{C-mol}} \quad (31)$$

337 which gives, at 39°C, the following value for the entropy of the methanogenesis process per mole (or  
338 C-mol) of biomass formed

$$339 \quad \Delta S_m = \frac{(\Delta H_m - \Delta G_m)}{(273.15 + 39)} = -16.96 \frac{\text{kJ}}{\text{K}^{-1} \text{ mol}} = -3.40 \frac{\text{kJ}}{\text{K}^{-1} \text{ C-mol}} \quad (28)$$

340 In Table 2, the changes in Gibbs energy, enthalpy and entropy observed here during methanogenesis  
341 of *M. ruminantium*, *M. smithii* and *M. formicium* on H<sub>2</sub>/CO<sub>2</sub> are compared with values found in the  
342 literature for other methanogens grown on different substrates.

### 343 **Dynamic description of *in vitro* kinetics**

344 The developed mathematical model was calibrated with the experimental data from *in vitro* growth  
345 experiments in Balch tubes. Table 3 shows the parameters of the dynamic kinetic model described in  
346 Equations 2-6. The reported value of  $\mu_{\max}$  for each methanogen corresponds to the average value  
347 obtained from five heat flux-time curves. From Table 3, it is concluded that *M. smithii* exhibited the  
348 highest growth rate constant, followed by *M. ruminantium* and finally *M. formicium*. In terms of the

349 affinity constant  $K_s$ , while *M. smithii* and *M. ruminantium* have a similar value, the affinity constant  
350 for *M. formicium* is lower in one order of magnitude.

351 Figure 3 displays the dynamics of the compounds in the methanogenesis for the three methanogens.  
352 Experimental data are compared against the model responses. Table 4 shows standard statistics for  
353 model evaluation. The model captures efficiently the overall dynamics of the methanogenesis.  
354 Hydrogen and methane are very well described by the model with concordance correlation coefficients  
355 (CCC) of 0.99 and 0.97 respectively. For carbon dioxide, CCC = 0.93.

356 Figure 4 displays the dynamics of OD<sub>600</sub> for the methanogens. To infer microbial biomass produced in  
357 the anabolic reaction, we used to the data from methane instead of OD<sub>600</sub> to avoid possible bias due to  
358 species-specific absorbance properties of the methanogens. The maximal production of methane  
359 among the three microbes was 0.36 mmol for *M. smithii* and 0.33 mmol for *M. ruminantium* and *M.*  
360 *formicium*, which gives an average value of 0.35 ±0.017 mmol (the standard deviation is 3.7% of the  
361 mean). This value is fully in agreement with the theoretical value of 0.37 mmoles derived from 1.48  
362 mmol of H<sub>2</sub> (average number of moles at t<sub>0</sub>) and a yield factor of 0.006. The agreement between the  
363 actual methane produced and the theoretical one confirms our hypothesis of considering the same yield  
364 factor for all the three methanogens. For our experiment in Balch tubes, approximately 0.009 mmol  
365 (1.02 g) of microbial biomass were produced.

366

## 367 **Discussion**

368 Our objective in this work was to quantitatively characterize the dynamics of hydrogen utilization,  
369 methane production, growth and heat flux of three hydrogenotrophic methanogens by integrating  
370 microbiology, thermodynamics and mathematical modelling. Our model developments were

371 instrumental to quantify energetic and kinetic differences between the three methanogens studied,  
372 strengthening the potentiality of microcalorimetry as a tool for characterizing the metabolism of  
373 microorganisms (34,35,47).

## 374 **Energetic and kinetic differences between methanogens**

375 Methanogenesis appears as simple reaction with a single limiting substrate ( $H_2$ ). The microcalorimetry  
376 approach we applied revealed that this simplicity is only apparent and that hydrogenotrophic  
377 methanogens exhibit energetic and kinetic differences. Methanogenesis is indeed a complex process  
378 that could be broken down in several stages. The dominant metabolic phase is represented by one peak  
379 that occurs at different times. The magnitude of the peak differs between the methanogens and also the  
380 slope of the heat flux trajectories. The return time of the heat flux to the zero baseline was also different.  
381 The energetic difference is associated to kinetic differences that translate into specific kinetic  
382 parameters, namely affinity constant ( $K_S$ ) and maximum growth rate constant ( $\mu_{max}$ ). Energetic  
383 differences between methanogens has been ascribed by the presence/absence of cytochromes (12).  
384 These differences are translated into different yield factors,  $H_2$  thresholds, and doubling times. The  
385 kinetic differences revealed in this study for three cytochrome lacking methanogens might indicate that  
386 other mechanisms than the presence of cytochromes might play a role on the energetics of  
387 methanogenesis. Interestingly, calorimetric experiments show that *M. ruminantium* was metabolically  
388 active faster than the other methanogens, suggesting a great adaptation capability for *M. ruminantium*  
389 which could be linked to its predominance in the rumen (48).

390 Looking at the expression of the affinity constant (Equation (8)), and given that we have assumed that  
391 all the three methanogens have the same yield factors, it follows that the exergies  $E_{dis}$ ,  $E_M$ ,  $E_{cat}$   
392 (kJ/mol) are common for all the three species, suggesting that the harvest volume  $v_{harv}$  is responsible  
393 for the differences between the affinity constants. Note that in the kinetic function developed by

394 Desmond-Le Quéméner and Bouchez (38), the maximum growth rate did not have any dependency on  
395 the energetics of the reaction. Our experimental study revealed that  $\mu_{\max}$  is species-specific and reflects  
396 the dynamics of the heat flux of the reaction at the exponential phase. Since our study is limited to  
397 three species, it is important to conduct further research on other methanogens to validate our findings.

398

### 399 **Thermodynamic analysis**

400 Regarding the energetic information for different methanogens summarized in Table 2, it is observed  
401 that the thermodynamic behaviour of our three methanogens is analogous to that observed for  
402 *Methanobacterium thermoautotrophicum* (49). The values reported in Table 3 show indeed that the  
403 methanogenesis on  $H_2/CO_2$  is characterized by a large heat production. The growth is highly  
404 exothermic, with a  $\Delta H_m$  value that largely exceeds the values found when other energy substrates are  
405 used. The enthalpy change  $\Delta H_m$ , which is more negative than the Gibbs energy change  $\Delta G_m$ , largely  
406 controls the process. Growth on  $H_2/CO_2$  is also characterized by a negative entropic contribution  $T\Delta S_m$   
407 which, at first sight, may look surprising since entropy increases in most cases of anaerobic growth  
408 (50). However, this can be understood if one remembers that  $T\Delta S_m$  corresponds in fact to the balance  
409 between the final state and the initial state of the process, that is

$$410 \quad T\Delta S_m = \frac{(1-10Y)}{4Y} T\Delta S_c + T\Delta S_a = \frac{(1-10Y)}{4Y} T(S_{final} - S_{initial})_c + T(S_{final} - S_{initial})_a$$

411 Methanogenesis on  $H_2/CO_2$  is particular because the final state of its catabolic reaction (1 mol  $CH_4$  +  
412 2 mol  $H_2O$ ) involves a smaller number of moles than the initial state (4 mol  $H_2$  + 1 mol  $CO_2$ ), which  
413 results in a significant loss of entropy during the process. For spontaneous growth in such a case, the  
414  $\Delta H_m$  must not only contribute to the driving force but must also compensate the growth-unfavourable

415  $T\Delta S_m$ , which means that  $\Delta H_m$  must be much more negative than  $\Delta G_m$  (51). For this reason,  
416 methanogenesis on  $H_2/CO_2$ , which is accompanied by a considerable decrease of entropy and a large  
417 production of heat, has been designed as an entropy-retarded process (52). More generally, (von  
418 Stockar and Liu) (51) noticed that when the Gibbs energy of the metabolic process is resolved into its  
419 enthalpic and entropic contributions, very different thermodynamic behaviours are observed depending  
420 on the growth type: aerobic respiration is clearly enthalpy-driven ( $\Delta H_m \ll 0$  and  $T\Delta S_m > 0$ ) whereas  
421 fermentative metabolism is mainly entropy-driven ( $\Delta H_m < 0$  and  $T\Delta S_m \gg 0$ ); methanogenesis on  
422  $H_2/CO_2$  is enthalpy-driven but entropy-retarded ( $\Delta H_m \ll 0$  and  $T\Delta S_m < 0$ ) whereas methanogenesis on  
423 acetate is entropy-driven but enthalpy-retarded ( $\Delta H_m > 0$  and  $T\Delta S_m \gg 0$ ). In the present case, the  
424 highly exothermic growth of *M. ruminantium*, *M. smithii* and *M. formicium* on  $H_2/CO_2$  is largely due  
425 to the considerable decrease of entropy during the process: in fact, 50% of the heat produced here  
426 serves only to compensate the loss of entropy. A proportion of 80% was found for *M.*  
427 *thermoautotrophicum* (49), which results from the fact that their  $T\Delta S_m$  and  $\Delta H_m$  values are,  
428 respectively, 2.7 and 1.7 times larger than ours. This difference might be due to the differences of  
429 temperature of the studies, namely 39°C in our study vs 60°C in the study by (49).

430

### 431 **Can we use our results to say something about species coexistence?**

432 The competitive exclusion principle states that coexistence cannot occur between species that occupy  
433 the same niche, that is that perform the same function (53), only the most competitive will survive.  
434 Recently, by using thermodynamic principles, Großkopf & Soyer (32) demonstrate theoretically that  
435 species utilizing the same substrate and producing different compounds can coexist by the action of  
436 thermodynamic driving forces. Since in our study, the three methanogens perform the same metabolic  
437 reactions, the thermodynamic framework developed Großkopf & Soyer (32) predicts, as the original

438 exclusion principle (53), the survival of only one species. For continuous culture of microorganisms,  
439 it has been demonstrated that at the equilibrium (growth rate equals the dilution rate) with constant  
440 dilution rates and substrate input rates, the species that has the lowest limiting substrate concentration  
441 wins the competition. From Eq. (12), the number of moles of hydrogen of the species  $n_{g,H_2,i}^*$  at the  
442 steady state is

$$443 \quad n_{g,H_2,i}^* = \frac{K_{s,i} \cdot V_g}{\log(\mu_{max,i}/D_i)}$$

444  
445 Using the model parameters of Table 3, we studied *in silico* three possible competition scenarios,  
446 assuming a constant environment (constant dilution rate  $D$ ). Two dilution rates were evaluated:  $D =$   
447  $0.021 \text{ h}^{-1}$  (retention time = 48 h) and  $D = 0.04 \text{ h}^{-1}$  (retention time = 25 h). For  $D = 0.021 \text{ h}^{-1}$ , we obtained  
448 that  $n_{g,H_2,Ms}^* = 0.36 \text{ mmol}$ ,  $n_{g,H_2,Mr}^* = 0.60 \text{ mmol}$ ,  $n_{g,H_2,Mf}^* = 0.16 \text{ mmol}$  where the subindex Ms, Mr,  
449 Mf stand for *M. smithii*, *M. ruminantium* and *M. formicium*. From these results, it appears that under  
450 a constant environment, *M. formicium* will win the competition. Since  $n_{g,H_2,Ms}^* < n_{g,H_2,Mr}^*$ , *M.*  
451 *ruminantium* will be extinguished before *M. smithii*. For  $D = 0.04 \text{ h}^{-1}$ , we obtained that  $n_{g,H_2,Ms}^* =$   
452  $0.57 \text{ mmol}$ ,  $n_{g,H_2,Mr}^* = 1.27 \text{ mmol}$ ,  $n_{g,H_2,Mf}^* = 0.93 \text{ mmol}$ , and thus *M. smithii* wins the competition.  
453 In a third hypothetical scenario, with  $D = 0.04 \text{ h}^{-1}$ , we ascribed to *M. ruminantium* better adhesion  
454 properties (it is known that both *M. ruminantium* and *M. smithii* genes encode adhesin-like proteins  
455 (54,55)). This enhanced adhesion property of *M. ruminantium* was translated mathematically by a  
456 factor modulating the microbial residence time as we proposed in our mathematical model of the human  
457 colon (18). We then assigned to *M. ruminantium* a 40% of the dilution rate of *M. smithii* and *M.*  
458 *formicium*. We obtained  $n_{g,H_2,Mr}^* = 0.50 \text{ mmol}$ , and thus *M. ruminantium* wins the competition. To  
459 illustrate these aspects, we built a multiple-species model with the three methanogens using Eq. (12)  
460 and Eq. (14). The parameter  $b$  was set to  $0.5 \text{ h}^{-1}$  and the hydrogen flux production  $q_{H_2}$  rate was set to

461 0.02 mol/min. Figure 5A displays the dynamics of the three methanogens for the first scenario ( $D=$   
462  $0.021 \text{ h}^{-1}$ ). It is observed that at 50 d only *M. formicium* survives. In the rumen context, this result  
463 however is not representative of what occurs in reality where the three methanogens coexist (56,57). It  
464 is intriguing that in our toy model it is *M. formicium* that wins the competition, bearing in mind that  
465 *M. ruminantium* and *M. smithii* are more abundant than *M. formicium* (48,57). Figure 5 shows that  
466 selective conditions favour the survival of one species. Similar results can be obtained for the human  
467 gut by including the effect of pH on microbial growth (21) and setting the gut pH to select one of the  
468 species. On the basis of the competitive exclusion principle, it is thus intriguing that having a very  
469 specialized function, methanogens are a diverse group that coexist. In the case of the rumen, our  
470 modelling work suggest that in addition to kinetic and thermodynamic factors, other forces contribute  
471 to the ecological shaping of the methanogens community in the rumen favouring the microbial  
472 diversity. Indeed, methanogenic diversity in the rumen results from multiple factors that include pH  
473 sensitivity, the association with rumen fractions (fluid and particulate material), and the endosymbiosis  
474 with rumen protozoa (48,57). For the human gut, ecological factors enable methanogens to coexist to  
475 competitive environment where hydrogenotrophic microbes (acetogens, methanogenic archaea and  
476 sulfate-reducing bacteria) utilize  $\text{H}_2$  via different pathways (58–60).

477 Finally, mathematical modelling is expected to enhance our understanding of gut ecosystems (61,62).  
478 It is then key that in addition to metabolic aspects, mathematical models of gut fermentation incorporate  
479 the multiple aspects that shape microbial dynamics to provide accurate predictions and improve insight  
480 on gut metabolism dynamics and its potential modulation.

481

## 482 **Acknowledgements**

483 We are grateful to Dominique Graviou (UMRH, Inra) for her skilled assistance on the *in vitro* growth  
484 experiments.

## 485 **Conflict of interest**

486 No conflict.

## 487 **References**

- 488 1. Miller TL, Wolin MJ, Hongxue Z, Bryant MP. Characteristics of methanogens isolated from  
489 bovine rumen. *Appl Environ Microbiol.* 1986;51(1):201–2.
- 490 2. Dridi B, Fardeau ML, Ollivier B, Raoult D, Drancourt M. *Methanomassiliicoccus luminyensis*  
491 gen. nov., sp. nov., a methanogenic archaeon isolated from human faeces. *Int J Syst Evol*  
492 *Microbiol.* 2012;62(8):1902–7.
- 493 3. Paul K, Nonoh JO, Mikulski L, Brune A. “Methanoplasmatales,” thermoplasmatales-related  
494 archaea in termite guts and other environments, are the seventh order of methanogens. *Appl*  
495 *Environ Microbiol.* 2012;78(23):8245–53.
- 496 4. Bang C, Weidenbach K, Gutschmann T, Heine H, Schmitz RA. The intestinal archaea  
497 *Methanosphaera stadtmanae* and *Methanobrevibacter smithii* activate human dendritic cells.  
498 *PLoS One.* 2014;9(6).
- 499 5. Ghavami SB, Rostami E, Sephay AA, Shahrokh S, Balaii H, Aghdaei HA, et al. Alterations of  
500 the human gut *Methanobrevibacter smithii* as a biomarker for inflammatory bowel diseases.  
501 *Microb Pathog.* 2018;117:285–9.
- 502 6. Mathur R, Barlow GM. Obesity and the microbiome. Vol. 9, Expert Review of



- 503 Gastroenterology and Hepatology. 2015. p. 1087–99.
- 504 7. Hook SE, Wright A-DG, McBride BW. Methanogens: methane producers of the rumen and  
505 mitigation strategies. *Archaea* 2010:945785.
- 506 8. Poulsen M, Schwab C, Jensen BB, Engberg RM, Spang A, Canibe N, et al. Methylophilic  
507 methanogenic Thermoplasmata implicated in reduced methane emissions from bovine rumen.  
508 *Nat Commun.* 2013;4:1428.
- 509 9. Jarvis GN, Strömpl C, Burgess DM, Skillman LC, Moore ERB, Joblin KN. Isolation and  
510 identification of ruminal methanogens from grazing cattle. *Curr Microbiol.* 2000;40(5):327–  
511 32.
- 512 10. Gerber P, Steinfeld H, Henderson B, Mottet A, Opio C, Dijkman J, et al. Tackling Climate  
513 Change through Livestock. Food and Agriculture Organization. 2013; 15-21.
- 514 11. King EE, Smith RP, St-Pierre B, Wright ADG. Differences in the rumen methanogen  
515 populations of lactating Jersey and holstein dairy cows under the same diet regimen. *Appl*  
516 *Environ Microbiol.* 2011;
- 517 12. Thauer RK, Kaster AK, Seedorf H, Buckel W, Hedderich R. Methanogenic archaea:  
518 Ecologically relevant differences in energy conservation. Vol. 6, *Nature Reviews*  
519 *Microbiology.* 2008. p. 579–91.
- 520 13. Friedman N, Jami E, Mizrahi I. Compositional and functional dynamics of the bovine rumen  
521 methanogenic community across different developmental stages. *Environ Microbiol.*  
522 2017;19(8):3365–73.
- 523 14. Hansen EE, Lozupone CA, Rey FE, Wu M, Guruge JL, Narra A, et al. Pan-genome of the

- 524 dominant human gut-associated archaeon, *Methanobrevibacter smithii*, studied in twins. Proc  
525 Natl Acad Sci [Internet]. 2011;108(Supplement\_1):4599–606.
- 526 15. Morgavi DP, Forano E, Martin C, Newbold CJ. Microbial ecosystem and methanogenesis in  
527 ruminants. *Animal* [Internet]. 2010 Jul [cited 2014 Nov 28];4(7):1024–36.
- 528 16. Jackson BE, McInerney MJ. Anaerobic microbial metabolism can proceed close to  
529 thermodynamic limits. *Nature*. 2002;415(6870):454–6.
- 530 17. González-Cabaleiro R, Lema JM, Rodríguez J, Kleerebezem R. Linking thermodynamics and  
531 kinetics to assess pathway reversibility in anaerobic bioprocesses. *Energy Environ Sci*. 2013;  
532 6(12):3780.
- 533 18. Muñoz-Tamayo R, Laroche B, Walter E, Doré J, Leclerc M. Mathematical modelling of  
534 carbohydrate degradation by human colonic microbiota. *J Theor Biol*. 2010; 266(1):189–201.
- 535 19. Van Wey AS, Lovatt SJ, Roy NC, Shorten PR. Determination of potential metabolic pathways  
536 of human intestinal bacteria by modeling growth kinetics from cross-feeding dynamics. *Food*  
537 *Res Int*. 2016;88:207–16.
- 538 20. Shoaie S, Ghaffari P, Kovatcheva-Datchary P, Mardinoglu A, Sen P, Pujos-Guillot E, et al.  
539 Quantifying Diet-Induced Metabolic Changes of the Human Gut Microbiome. *Cell Metab*.  
540 2015;22(2):320–31.
- 541 21. Kettle H, Louis P, Holtrop G, Duncan SH, Flint HJ. Modelling the emergent dynamics and  
542 major metabolites of the human colonic microbiota. *Env Microbiol*. 2014; 17(5):1615–30.
- 543 22. Janssen PH. Influence of hydrogen on rumen methane formation and fermentation balances  
544 through microbial growth kinetics and fermentation thermodynamics. *Anim Feed Sci Technol*.

- 545 2010; 160(1–2):1–22.
- 546 23. Kohn R a, Boston RC. The Role of Thermodynamics in Controlling Rumen Metabolism.  
547 Model Nutr Util Farm Anim. 2000;11–24.
- 548 24. Offner A, Sauvant D. Thermodynamic modeling of ruminal fermentations. Anim Res.  
549 2006;55(5):343–65.
- 550 25. Ungerfeld EM. A theoretical comparison between two ruminal electron sinks. Front Microbiol.  
551 2013;4.
- 552 26. Van Lingen HJ, Plugge CM, Fadel JG, Kebreab E, Bannink A, Dijkstra J. Thermodynamic  
553 driving force of hydrogen on rumen microbial metabolism: A theoretical investigation. PLoS  
554 One. 2016;11(10).
- 555 27. Ghimire S, Gregorini P, Hanigan MD. Evaluation of predictions of volatile fatty acid  
556 production rates by the Molly cow model. J Dairy Sci. 2014;97(1):354–62.
- 557 28. Heijnen JJ, Van Dijken JP. In search of a thermodynamic description of biomass yields for the  
558 chemotrophic growth of microorganisms. Biotechnol Bioeng. 1992;39(8):833–58.
- 559 29. Kleerebezem R, Van Loosdrecht MCM. A Generalized Method for Thermodynamic State  
560 Analysis of Environmental Systems. Crit Rev Environ Sci Technol. 2010;40(1):1–54.
- 561 30. Hoh CY, Cord-Ruwisch R. A practical kinetic model that considers endproduct inhibition in  
562 anaerobic digestion processes by including the equilibrium constant. Biotechnol Bioeng.  
563 1996;51(5):597–604.
- 564 31. Desmond-Le Quemener E, Bouchez T. A thermodynamic theory of microbial growth. Isme J.  
565 2014;8(8):1747–51.

- 566 32. Großkopf T, Soyer OS. Microbial diversity arising from thermodynamic constraints. *ISME J.*  
567 2016;10(11):2725–33.
- 568 33. Wolfe RS. Techniques for cultivating methanogens. *Methods Enzymol.* 2011;494:1–22.
- 569 34. Bricheux G, Bonnet JL, Bohatier J, Morel JP, Morel-Desrosiers N. Microcalorimetry: a  
570 powerful and original tool for tracking the toxicity of a xenobiotic on *Tetrahymena pyriformis*.  
571 *Ecotoxicol Env Saf.* 2013;98:88–94.
- 572 35. Braissant O, Bonkat G, Wirz D, Bachmann A. Microbial growth and isothermal  
573 microcalorimetry: Growth models and their application to microcalorimetric data.  
574 *Thermochim Acta.* 2013;555:64–71.
- 575 36. Muñoz-Tamayo R, Giger-Reverdin S, Sauvant D. Mechanistic modelling of in vitro  
576 fermentation and methane production by rumen microbiota. *Anim Feed Sci Technol.*  
577 2016;220.
- 578 37. Batstone DJ, Keller J, Angelidaki I, Kalyuzhnyi S V, Pavlostathis SG, Rozzi A, et al.  
579 *Anaerobic Digestion Model No.1 (ADM1)*. IWA Publishing, London; 2002. 65-73 p.
- 580 38. Desmond-Le Quéméner E, Bouchez T. A thermodynamic theory of microbial growth. *ISME J.*  
581 2014;8(8):1747–51.
- 582 39. Kleerebezem R, Van Loosdrecht MCM. A Generalized Method for Thermodynamic State  
583 Analysis of Environmental Systems. *Crit Rev Environ Sci Technol [Internet]*. 2010;40(1):1–  
584 54.
- 585 40. Walter E, Pronzato L. *Identification of Parametric Models from Experimental Data*. Springer,  
586 London; 1997.

- 587 41. Muñoz-Tamayo R, Puillet L, Daniel JB, Sauvant D, Martin O, Taghipoor M, et al. Review: To  
588 be or not to be an identifiable model. Is this a relevant question in animal science modelling?  
589 *Animal*. 2018;12(4):701–12.
- 590 42. Bellu G, Saccomani MP, Audoly S, D’Angiò L. DAISY: A new software tool to test global  
591 identifiability of biological and physiological systems. *Comput Methods Programs Biomed*.  
592 2007;88(1):52–61.
- 593 43. Vanrolleghem PA, Vandaele M, Dochain D. Practical Identifiability of a Biokinetic Model of  
594 Activated-Sludge Respiration. *Water Res*. 1995;29(11):2561–70.
- 595 44. Muñoz-Tamayo R, Laroche B, Leclerc M, Walter E. IDEAS: A parameter identification  
596 toolbox with symbolic analysis of uncertainty and its application to biological modelling. In:  
597 *IFAC Proceedings Volumes (IFAC-PapersOnline)*. 2009.
- 598 45. Wagman DD, Evans WH, Parker VB, Schumm RH, Halow I, Bailey SM, et al. The Nbs  
599 Tables of Chemical Thermodynamic Properties - Selected Values for Inorganic and C-1 and  
600 C-2 Organic-Substances in Si Units. *J Phys Chem Ref Data*. 1982;11:S2.
- 601 46. Prigogine I, Defay R. *Traité de thermodynamique, conformément aux méthodes de Gibbs et*  
602 *De Donder*. Éditions Desoer. Liège; 1950.
- 603 47. Ruiz T, Bec A, Danger M, Koussoroplis A, Aguer J, Morel J, et al. A microcalorimetric  
604 approach for investigating stoichiometric constraints on the standard metabolic rate of a small  
605 invertebrate. *Ecol Lett*. 2018;21:1714–22.
- 606 48. Janssen PH, Kirs M. Structure of the archaeal community of the rumen. *Appl Environ*  
607 *Microbiol*. 2008;74(12):3619–25.

- 608 49. Schill NA, Liu JS, von Stockar U. Thermodynamic analysis of growth of *Methanobacterium*  
609 *thermoautotrophicum*. *Biotechnol Bioeng.* 1999;64(1):74–81.
- 610 50. von Stockar U, Larsson C, Marison IW. Calorimetry and energetic efficiencies in aerobic and  
611 anaerobic microbial growth. *Pure Appl Chem.* 1993;65(9):1889–92.
- 612 51. Von Stockar U, Liu JS. Does microbial life always feed on negative entropy? Thermodynamic  
613 analysis of microbial growth. *Biochim Biophys Acta - Bioenerg.* 1999;1412(3):191–211.
- 614 52. Schill N, Liu J-S, von Stockar U. Thermodynamic analysis of growth of *methanobacterium*  
615 *thermoautotrophicum*. *Biotechnol Bioeng.* 1999;64(1):74–81.
- 616 53. Hardin G. The Competitive Exclusion Principle. *Science.* 1960;131(3409):1292–7.
- 617 54. Ng F, Kittelmann S, Patchett ML, Attwood GT, Janssen PH, Rakonjac J, et al. An adhesin  
618 from hydrogen-utilizing rumen methanogen *Methanobrevibacter ruminantium* M1 binds a  
619 broad range of hydrogen-producing microorganisms. *Env Microbiol.* 2016;18(9):3010–21.
- 620 55. Samuel BS, Hansen EE, Manchester JK, Coutinho PM, Henrissat B, Fulton R, et al. Genomic  
621 and metabolic adaptations of *Methanobrevibacter smithii* to the human gut. *Proc Natl Acad*  
622 *Sci.* 2007;104(25):10643–8.
- 623 56. Kelly WJ, Leahy SC, Li D, Perry R, Lambie SC, Attwood GT, et al. The complete genome  
624 sequence of the rumen methanogen *Methanobacterium formicicum* BRM9. *Stand Genomic*  
625 *Sci.* 2014;9(1):1–8.
- 626 57. Carberry CA, Waters SM, Kenny DA, Creevey CJ. Rumen methanogenic genotypes differ in  
627 abundance according to host residual feed intake phenotype and diet type. *Appl Env*  
628 *Microbiol.* 2014;80(2):586–94.

- 629 58. Bernalier A, Lelait M, Rochet V, Grivet JP, Gibson GR, Durand M. Acetogenesis from H<sub>2</sub> and  
630 CO<sub>2</sub> by methane- and non-methane-producing human colonic bacterial communities. *FEMS*  
631 *Microbiol Ecol.* 1996;19(3):193–202.
- 632 59. Nava GM, Carbonero F, Croix JA, Greenberg E, Gaskins HR. Abundance and diversity of  
633 mucosa-associated hydrogenotrophic microbes in the healthy human colon. *ISME J.*  
634 2012;6(1):57–70.
- 635 60. Flint HJ, Duncan SH, Scott KP. Minireview Interactions and competition within the microbial  
636 community of the human colon : links between diet and health. *Environ Microbiol.* 2007;
- 637 61. Widder S, Allen RJ, Pfeiffer T, Curtis TP, Wiuf C, Sloan WT, et al. Challenges in microbial  
638 ecology: Building predictive understanding of community function and dynamics. *ISME J.*  
639 2016;10(11):2557–68.
- 640 62. Huws SA, Creevey, Christopher J. Oyama LB, Mizrahi I, Denman SE, Popova M, Muñoz-  
641 Tamayo, Rafael Forano E, et al. Addressing global ruminant agricultural challenges through  
642 understanding the rumen microbiome: Past, present and future. *Front Microbiol.* 2018;9:2161.
- 643 63. Liu JS, Marison IW, von Stockar U. Microbial growth by a net heat up-take: A calorimetric  
644 and thermodynamic study on acetotrophic methanogenesis by *Methanosarcina barkeri*.  
645 *Biotechnol Bioeng.* 2001;75(2):170–80.
- 646
- 647
- 648
- 649

650 **Table 1** Standard enthalpies ( $\Delta H_f^\circ$ ) and Gibbs energies ( $\Delta G_f^\circ$ ) of formation at 25°C of compounds  
651 involved in hydrogenotrophic methanogenesis. Values were extracted from Wagman et al (45), with  
652 the exception of the microbial biomass that was calculated from values for *Methanosarcina barkeri*  
653 reported by Liu et al. (63)

| Compound (phase)                               | $\Delta H_f^\circ$ (kJ/mol) | $\Delta G_f^\circ$ (kJ/mol) |
|------------------------------------------------|-----------------------------|-----------------------------|
| H <sub>2</sub> O (l)                           | -285.830                    | -237.129                    |
| H <sub>2</sub> (g)                             | 0                           | 0                           |
| CO <sub>2</sub> (g)                            | -393.509                    | -394.359                    |
| CH <sub>4</sub> (g)                            | -74.81                      | -50.72                      |
| NH <sub>3</sub> (aq)                           | -80.29                      | -26.50                      |
| C <sub>5</sub> H <sub>7</sub> O <sub>2</sub> N | -511.50*                    | -349.50*                    |

654 \* These values are five times the values reported by Liu et al. (63) since the biomass formula we used  
655 has five carbon molecules, while the biomass formula used by Liu et al. has one carbon.

656

657

658



659 **Table 2** Gibbs energies, enthalpies and entropies of metabolic processes involving some methanogens  
 660 growing on different energy sources

| Microorganism                                                         | Energy substrate                | Growth conditions | $\Delta G_m$<br>kJ / C-<br>mol | $\Delta H_m$<br>kJ / C-mol | $T\Delta S_m$<br>kJ / K <sup>-1</sup> C-<br>mol | Driving force                               | Reference    |
|-----------------------------------------------------------------------|---------------------------------|-------------------|--------------------------------|----------------------------|-------------------------------------------------|---------------------------------------------|--------------|
| <i>M. ruminantium</i> ,<br><i>M. smithii</i> ,<br><i>M. formicium</i> | H <sub>2</sub> /CO <sub>2</sub> | anaerobic         | -1073                          | -2139                      | -1066                                           | Enthalpy-driven<br>but Entropy-<br>retarded | this<br>work |
| <i>M. thermo-<br/>autotrophicum</i>                                   | H <sub>2</sub> /CO <sub>2</sub> | anaerobic         | -802                           | -3730                      | -2928                                           | Enthalpy-driven<br>but Entropy-<br>retarded | (52)         |
| <i>M. formicium</i>                                                   | formate                         | anaerobic         | -880                           | -613                       | +267                                            | Enthalpy-driven                             | (28)         |
| <i>M. barkeri</i>                                                     | methanol                        | anaerobic         | -570                           | -420                       | +150                                            | Enthalpy-driven                             | (28)         |
| <i>M. barkeri</i>                                                     | acetate                         | anaerobic         | -366                           | +145                       | +511                                            | Entropy-driven<br>but enthalpy-<br>retarded | (63)         |

661

662

663

664 **Table 3 Parameters of the model of *in vitro* methanogenesis. The value reported**  
 665  $\mu_{\max}$  for each methanogen is the mean value obtained from five heat flux-time curves

| Parameter                            | Definition                                | Value                 |                       |                     |
|--------------------------------------|-------------------------------------------|-----------------------|-----------------------|---------------------|
| $k_{La}$ (h <sup>-1</sup> )          | Liquid-gas transfer constant              | 8.33                  |                       |                     |
| $K_{H,CO_2}$ (M/bar)                 | Henry's law coefficient of carbon dioxide | 0.0246                |                       |                     |
| $k_d$ (h <sup>-1</sup> )             | Death cell rate constant                  | 8.33x10 <sup>-4</sup> |                       |                     |
| Y (mol biomass /mol H <sub>2</sub> ) | Microbial biomass yield factor            | 0.006                 |                       |                     |
|                                      |                                           | <i>M. smithii</i>     | <i>M. ruminantium</i> | <i>M. formicium</i> |
| $K_s$ (mol/L)                        | Affinity constant                         | 0.032                 | 0.037                 | 0.007               |
| $\mu_{\max}$ (h <sup>-1</sup> )      | Maximum specific growth rate constant     | 0.12                  | 0.07                  | 0.046               |

666

667

668

669

670 **Table 4 Statistical indicators for model evaluation**

| Component      | CCC* | $r^2$ | CV <sub>RMSE</sub> ** |
|----------------|------|-------|-----------------------|
| Hydrogen       | 0.99 | 0.97  | 14                    |
| Methane        | 0.97 | 0.95  | 17                    |
| Carbon dioxide | 0.93 | 0.86  | 6                     |

671 \* CCC: Lin's concordance correlation coefficient.

672 \*\* CV<sub>RMSE</sub>: coefficient of variation of the root mean squared error.

673

674

675

676

677

678

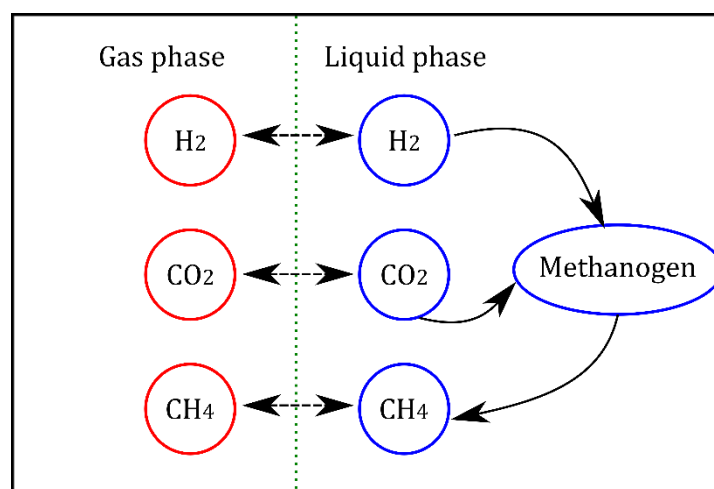

679

680 **Figure 1** Schematics of the *in vitro* methanogenesis process. Double arrows represent fluxes due to  
681 liquid-gas transfer, simple arrows represent metabolic fluxes.

682

683

684

685

686

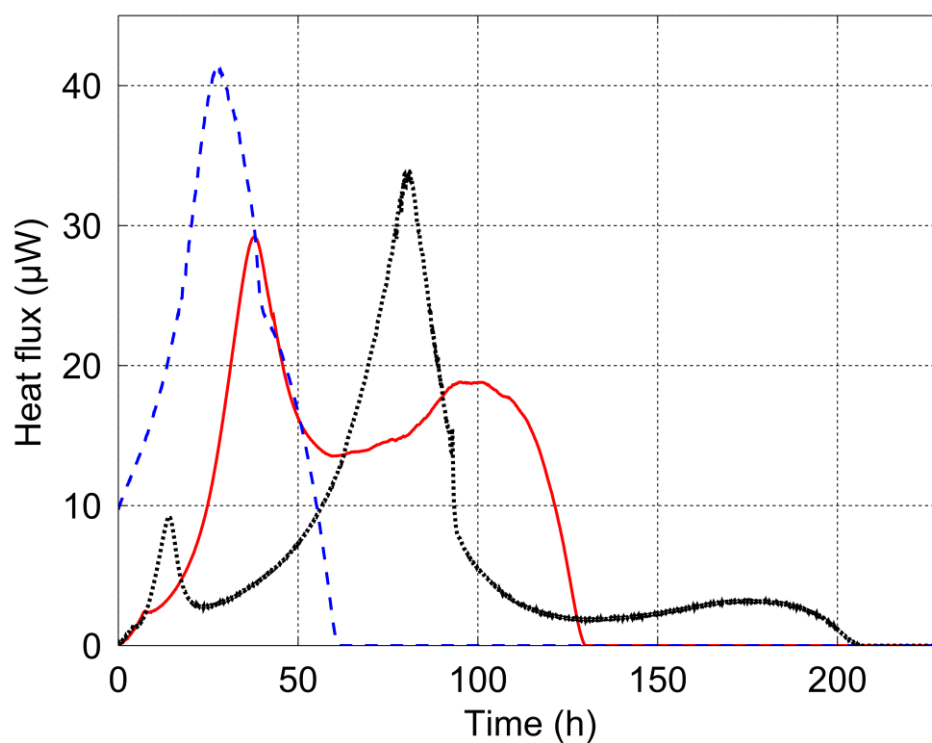

687

688 **Figure 2** Example of isothermal calorimetric curves for *M. ruminantium* (dashed blue line), *M. smithii*  
689 (solid red line) and *M. formicium* (dotted black line). The dominant metabolic phase is represented by  
690 one peak. The magnitude of the peak differs between the methanogens and also the slope of the heat  
691 flux trajectories. The return of the heat flux to the zero baseline also differs between the three  
692 methanogens.

693

694

695

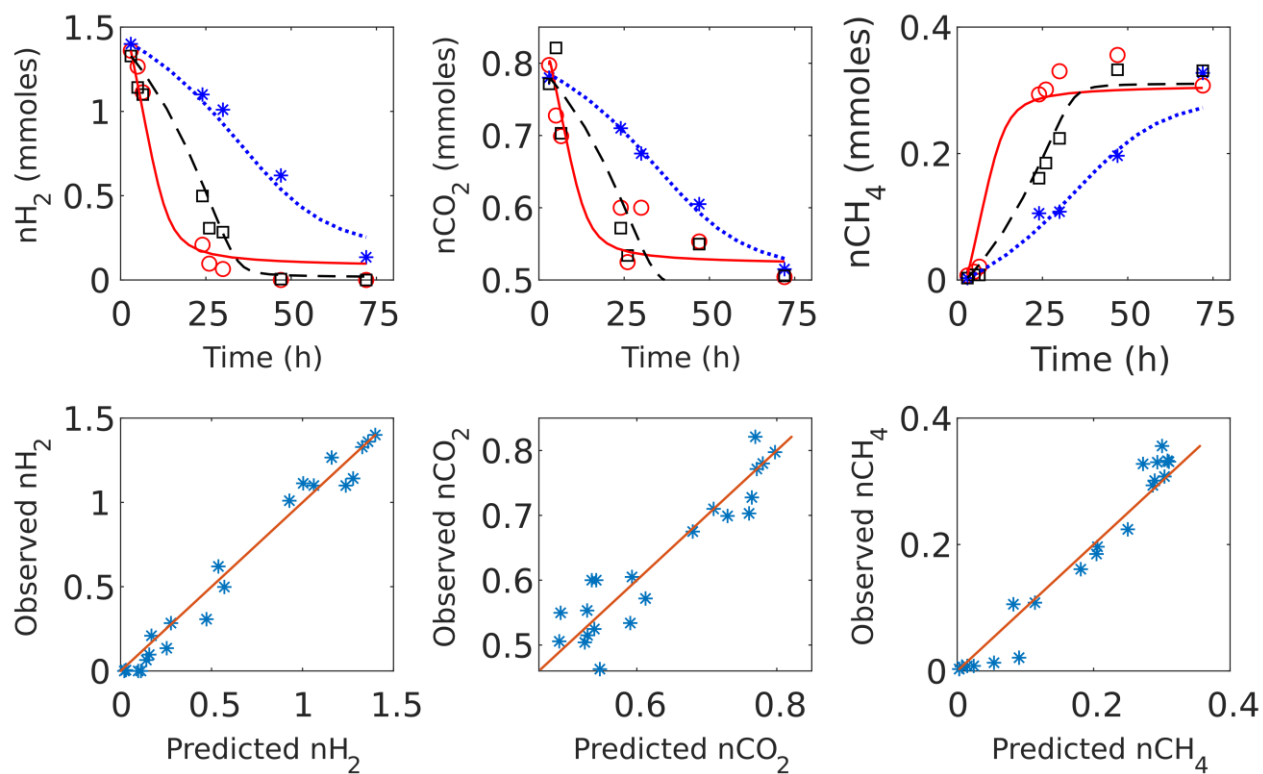

696

697 **Figure 3** Top plots: dynamics of methanogenesis by *M. ruminantium* (\*), *M. smithii* (o) and *M.*  
698 *formicium* (□). Experimental data (\*,o,□) are compared against model predicted responses: dotted blue  
699 lines (*M. ruminantium*), solid red lines (*M. smithii*) and dashed black lines (*M. formicium*). Bottom  
700 plots: summary of observed vs predicted variables. The solid red line is the isocline.

701

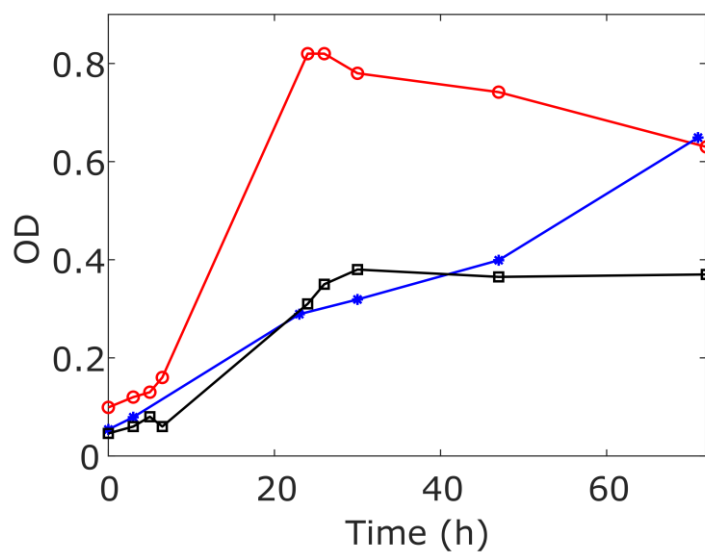

702

703 **Figure 4** Dynamics of the optical density (OD<sub>600</sub>) for *M. ruminantium* (\*), *M. smithii* (o) and *M.*  
704 *formicum* (□). Maximal values differ between the three methanogens.

705

706

707

708

709

710

711

712

713

714

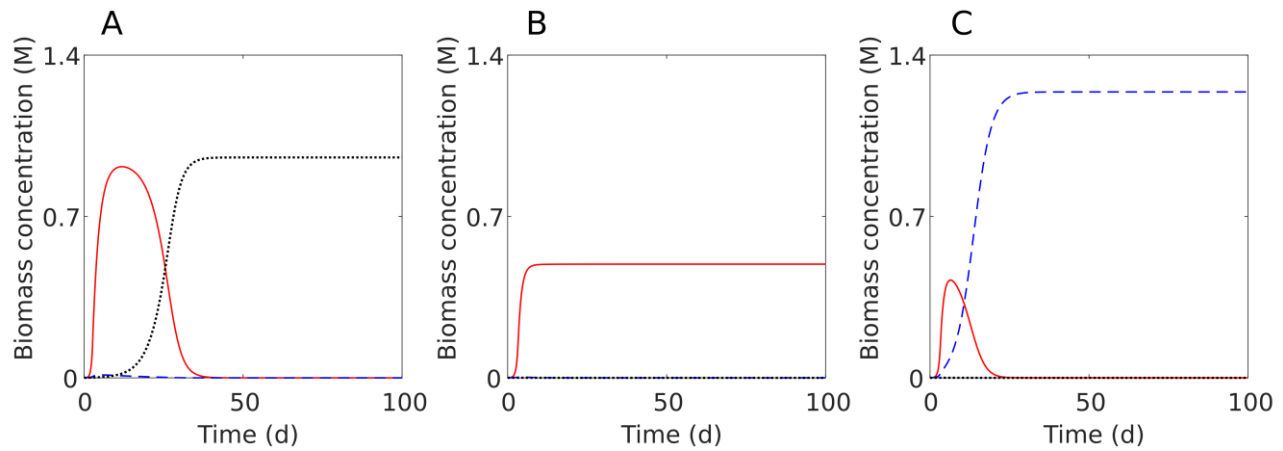

715

716 **Figure 5** Possible competition scenarios between *M. ruminantium* (blue dashed line), *M. smithii* (red  
717 solid line) and *M. formicium* (black dotted line) in a hypothetical constant environment. A. At constant  
718 dilution rate of  $0.021 \text{ h}^{-1}$ , *M. formicium* displaces the other two methanogens. B. With a constant  
719 dilution rate of  $0.04 \text{ h}^{-1}$ , *M. smithii* wins the competition. C. Assuming that, thanks to its adhesion  
720 properties, *M. ruminantium* has a 40% lower dilution rate than that of the other methanogens, it wins  
721 the competition. At constant environmental conditions, only one species wins and displaces the other  
722 methanogens.

723

724

725

726

727

728

729

730



731 **Supplementary Material**

732 **Table S1 Methanogens growth media composition.**

| Composition per 100 ml                                               | Amount    |
|----------------------------------------------------------------------|-----------|
| Clarified rumen fluid                                                | 30 ml     |
| Dipotassium phosphate (K <sub>2</sub> HPO <sub>4</sub> ) 0.06% (w/v) | 5 ml      |
| Balch Mineral solution <sup>1</sup>                                  | 5 ml      |
| Tryptone                                                             | 0.2 g     |
| Yeast extract                                                        | 0.2 g     |
| Balch oligo-elements solution <sup>2</sup>                           | 1 ml      |
| Balch vitamin solution <sup>3</sup>                                  | 1 ml      |
| Resazurin 0.1%                                                       | 1 ml      |
| Ammonium chloride                                                    | 0.05 g    |
| Sodium acetate                                                       | 0.25 g    |
| Sodium formate                                                       | 0.25 g    |
| Sodium carbonate                                                     | 0.5g      |
| L-cystein HCl                                                        | 0.4g      |
| Distilled water                                                      | qs 100 ml |

733 <sup>1</sup> KH<sub>2</sub>PO<sub>4</sub>·2H<sub>2</sub>O (0.6g), (NH<sub>4</sub>)<sub>2</sub>SO<sub>4</sub> (0.6g), NaCl (1.2g), MgSO<sub>4</sub>·7H<sub>2</sub>O (0.12g), CaCl<sub>2</sub>·2H<sub>2</sub>O (0.12g), distilled water qs 100  
734 ml

735 <sup>2</sup> Nitrioltriactic acid (0.15 g), MgSO<sub>4</sub>·7H<sub>2</sub>O (0.3g), MnSO<sub>4</sub>·2H<sub>2</sub>O (0.05g), NaCl (0.1g), FeSO<sub>4</sub>·7H<sub>2</sub>O (0.01g), CoSO<sub>4</sub>  
736 (0.01g), CaCl<sub>2</sub>·2H<sub>2</sub>O (0.01g), ZnSO<sub>4</sub>·2H<sub>2</sub>O (0.01g), CuSO<sub>4</sub>·5H<sub>2</sub>O (0.001g), AlK(SO<sub>4</sub>)<sub>2</sub> (0.001g), H<sub>3</sub>BO<sub>3</sub> (0.001g),  
737 NaMoO<sub>4</sub>·2H<sub>2</sub>O (0.001g), NiCl<sub>6</sub>H<sub>2</sub>O (0.01g), Na<sub>2</sub>SeO<sub>3</sub> (0.001g), distilled water qs 100 ml

738 <sup>3</sup> Biotine (0.2 mg), PABA (0.5 mg), Riboflavine (0.5 mg), Pantothenic acid (0.5 mg), Sodium ascorbate (0.5 mg), Folic  
739 acid (0.2 mg), Niacin (0.5 mg), Pyridoxine (0.10 mg), thiamine (0.05 mg), Vitamin B12 0.1mg/ml (0.1 ml), lipoic acid  
740 (0.5 mg), Choline chloride (0.5 mg), Inositol (0.5 mg), Nicotinamide (0.5 mg), Pyridoxal (0.5mg), distilled water qs 100  
741 ml

742 **Table S2**

743 Inoculation conditions

744

| <u>Strain</u>           | <u><i>Methanobrevibacter ruminantium</i></u> | <u><i>Methanobrevibacter smithii</i></u> | <u><i>Methanobacterium formicium</i></u> | <u>Effect of the experiment</u> |
|-------------------------|----------------------------------------------|------------------------------------------|------------------------------------------|---------------------------------|
| Initial OD              | 0.054                                        | 0.099                                    | 0.046                                    | <0.001                          |
| Initial pressure (mbar) | 2996                                         | 2927                                     | 2910                                     | 0.0025                          |

745
